# Supplementary material for: Lightella neohaematopini: A new lineage of highly reduced endosymbionts coevolving with chipmunk lice of the genus Neohaematopinus
Source: Front Microbiol. 2022 Aug 1;13:900312. doi: 10.3389/fmicb.2022.900312 (PMC9376444; doi:10.3389/fmicb.2022.900312)
Supplement: Supplementary file 4 [file Table_3.XLSX]

## Sheet: Legend
Sheet Name	Description
Phylogenetic_matrix_genomes	a-List of accession numbers and abbreviations for genomes used in the "phylogenetic matrix". Green background = taxa included into the "reduced phylogenetic matrix".
Phylogenetic_matrix_genelist	b-List of single-copy ortholog genes used in the "phylogenetic matrix". The order of genes shown in this table corresponds to the order of gene alignments in the concatenated phylogenetic matrix.
Coevolutionary_matrix_genomes	c-List of accession numbers and abbreviations for genomes used in the "coevolutionary matrix"; number of single-copy orthologs shared by the samples.
Coevolutionary_matrix_genelist	d-List of single-copy ortholog genes used in the 5-protein and 50-protein "coevolutionary matrix". The order of genes shown in this table corresponds to the order of gene alignments in the concatenated matrices. Grey background = Taxon omitted in the 50-protein "coevolutionary matrix".
Neisseriales_matrix_genomes	e-List of accession numbers and abbreviations for genomes used in the "Neisseriales matrix".
Neisseriales_matrix_genelist	f-List of single-copy ortholog genes used in the Neisseriales matrix. The order of genes shown in this table corresponds to the order of gene alignments in the concatenated "Neisseriales matrix".
Accessionnumbers_genomedrafts	g-List of accession numbers for the genome drafts retrieved in this study

## Sheet: a-Phylogenetic__matrix_genomes
Accesion	Taxon (NCBI)	Taxon abbreviation (used in alignment)		Green background = taxa included into the reduced phylogenetic matrix
NZ_CP013920.1	Arsenophonus symbiont of Lipoptena fortisetosa strain CB	ArLipo
2510065004	Arsenophonus melophagi ArM	Armelo
2524614872	Arsenophonus nasoniae DSM 15247	Arnaso
2606217112	Arsenophonus endosymbiont of Nilaparvata lugens	ArNilu
2744054871	Candidatus Arsenophonus triatominarum ATi	Artria
NZ_CP011787.1	Candidatus Baumannia cicadellinicola strain B-GSS	BaucBB
NZ_CP008985.1	Candidatus Baumannia cicadellinicola strain BGSS	BaucBG
NC_007984.1	Baumannia cicadellinicola str. Hc (Homalodisca coagulata)	BaucHc
GCA_004343195.1	Biostraticola tofi	Biotof
2627853719	Blochmannia endosymbiont of Camponotus (Colobopsis) obliquus 757	BlocCo
637000057	Candidatus Blochmannia pennsylvanicus BPEN	Blocpe
2627853703	Blochmannia endosymbiont of Polyrhachis (Hedomyrma) turneri	BlocPt
2695420346	Brenneria goodwinii OBR1	Brengo
2654587723	Buchnera aphidicola (Aphis glycines) BAg	BuapAg
2511231206	Buchnera aphidicola Ak	BuapAk
639633012	Buchnera aphidicola Bp	BuapBp
643348521	Buchnera aphidicola Cc	BuapCc
650716012	Buchnera aphidicola Ct	BuapCt
2718218137	Buchnera aphidicola (Diuraphis noxia)	BuapDn
2558860197	Buchnera aphidicola F009	BuapF0
637000045/NC_004061.1	Buchnera aphidicola str. Sg (Schizaphis graminum)	BuapSg
643348522	Buchnera aphidicola Tuc7	BuapTu
2511231158	Buchnera aphidicola Ua	BuapUa
NZ_CP007044.2	Chania multitudinisentens	Chanmu
NC_009792.1	Citrobacter koseri ATCC BAA-895	Citkos
NC_013716.1	Citrobacter rodentium ICC168	Citrod
NC_013282.2	Cronobacter turicensis	Crontu
NZ_CM001904.1	Dickeya chrysanthemi NCPPB 516	Dicchr
NZ_CM001857.1	Dickeya paradisiaca NCPPB 2511	Dicpar
NZ_LN999833.1	Enterobacteriaceae bacterium symbiont of Maconellicoccus hirsutus isolate DEMHIR	DoenMh
NC_000913.3	Escherichia coli str. K-12 substr. MG1655	EcoK12
NZ_CP020466.1	Edwardsiella ictaluri strain RUSVM-1	Edwict
NC_017309.1	Edwardsiella tarda FL6-60	Edwtar
NC_018419.1	secondary endosymbiont of Ctenarytaina eucalypti	endoCe
NC_018420.1	secondary endosymbiont of Heteropsylla cubana	endoHc
NC_014121.1	Enterobacter cloacae subsp. cloacae ATCC 13047	Entclo
NC_009778.1	Enterobacter (Cronobacter) sakazakii ATCC BAA-894	Entsak
NC_009436.1	Enterobacter sp. 638	Entsp6
NC_013961.1	Erwinia amylovora CFBP1430	Erwamy
NC_014306.1	Erwinia billingiae Eb661	Erwbil
NC_004547.2	Erwinia carotovora subsp. atroseptica SCRI1043	Erwcar
NZ_MAYS01000608.1++	Candidatus Erwinia dacicola strain IL	Erwdac
NC_012214.1	Erwinia pyrifoliae Ep1/96	Erwpyr
NC_010694.1	Erwinia tasmaniensis Et1/99	Erwtas
NZ_LM655252.1	Candidatus Evansia muelleri CEM1.1	EvmuCE
NZ_LN999832.1	Enterobacteriaceae bacterium symbiont of Ferrisia virgata isolate GEFVIR	GuenFv
NC_012751.1	Candidatus Hamiltonella defensa 5AT	Had5AT
NZ_CP016303.1	Candidatus Hamiltonella defensa (Bemisia tabaci) strain MEAM1	HadMEA
2548876931	Candidatus Hamiltonella defensa MED (Bemisia tabaci)	HadMED
NC_000907.1	Haemophilus influenzae Rd KW20	Haeinf
NZ_LN999835.1	Candidatus Hoaglandella endobia	Hoagen
NZ_AP010872.1	Candidatus Ishikawaella capsulata Mpkobe	IscaMp
NC_012731.1	Klebsiella pneumoniae NTUH-K2044	Klebpn
NC_013850.1	Klebsiella variicola At-22	Klebva
NZ_LN999831.1	Enterobacteriaceae bacterium symbiont of Paracoccus marginatus isolate MEPMAR	MienPm
NC_021057.1	Candidatus Moranella endobia PCVAL	MoenPC
NC_013956.2	Pantoea ananatis LMG 20103	Panana
NZ_CP010907.1	Candidatus Pantoea carbekii strain US	Pancar
648028049	Pantoea vagans C9-01	Panvag
NC_012917.1	Pectobacterium carotovorum subsp. carotovorum PC1	Pectca
NC_013421.1	Pectobacterium parmentieri WPP163	Pectpa
NC_012962.1	Photorhabdus asymbiotica ATCC43949	Phoasy
NC_005126.1	Photorhabdus luminescens subsp. laumondii TTO1	Pholum
NC_022546.1	Plautia stali symbiont	Plaust
NZ_CP008918.1	Pasteurella multocida strain ATCC 43137	Pmulto
NZ_CP010423.1	Pragia fontium strain 24613	Prafon
NC_010554.1	Proteus mirabilis HI4320	Protmi
NZ_CP017671.1	Providencia rettgeri strain RB151	Provre
2690315861	Candidatus Providencia siddallii officinalis GTOCOR	Provsi
NC_017731.1	Providencia stuartii MRSN 2154	Provst
NC_002516.2	Pseudomonas aeruginosa PAO1	Pseuda
NZ_LKAS01000001.1+NZ_LKAS01000002.1	Bacterium endosymbiont of Pedicinus badii strain PRUG	PuchPb
NC_017047.1	Rahnella aquatilis HX2	Raaqua
2507262005	Candidatus Regiella insecticola 5.15	Rei515
648861007	Candidatus Regiella insecticola LSR1	ReinLS
CP012849.1	Candidatus Riesia sp. GBBU genome	RiGBBU
NZ_CP012839.1	Candidatus Riesia pediculischaeffi	Ripedi
NZ_CP012841.1	Candidatus Riesia pediculicola strain HHAC	RipeHH
NC_014109.1	Candidatus Riesia pediculicola USDA	RipeUS
NC_003197.2	Salmonella enterica subsp. enterica serovar Typhimurium str. LT2	SaenTy
NZ_HG326223.1	Serratia marcescens subsp. marcescens Db11	SemaDb
NC_009832.1	Serratia proteamaculans 568	Sepr56
2511231072	Serratia symbiotica Cinara cedri	SesyCc
2636415529	Serratia symbiotica CWBI2.3	SesyCW
2528768011	Serratia symbiotica SCt-VLC	SesySC
LN890288.1	Serratia symbiotica strain STs	SesyST
651285005	Serratia symbiotica Tuscon	SesyTu
NZ_LT897836.1	Sodalis endosymbiont of Henestaris halophilus isolate HBA	SoenHh
2684622503	Sodalis-like endosymbiont of Proechinophthirus fluctus	SoenPf
NC_007712.1	Sodalis glossinidius str. 'morsitans'	Soglos
http://users.prf.jcu.cz/novake01/*	Candidatus Sodalis melophagi	Somelo
NZ_CP006568.1	Candidatus Sodalis pierantonius str. SOPE	Sopier
NZ_CP006569.1	Sodalis praecaptivus strain HS1	Soprae
2585428135	Sodalis-like symbiont of Philaenus spumarius PSPU	SosyPs
NZ_AP014521.1	Candidatus Tachikawaea gelatinosa	Tachge
GCA_001297775.1	Trabulsiella odontotermitis TbOT1.10	Trabod
NC_002505.1+NC_002506.1	Vibrio cholerae O1 biovar eltor str. N16961	Vibcho
2660238586/LN774881.1	Candidatus Westeberhardia cardiocondylae str. obscurior	Wecaob
NC_004344.2	Wigglesworthia glossinidia endosymbiont of Glossina brevipalpis	WiglGb
NC_016893.1	Wigglesworthia glossinidia endosymbiont of Glossina morsitans morsitans (Yale colony)	WiglGm
NZ_CP022263.1	Xanthomonas citri pv. vignicola strain CFBP7111	Xancit
NC_013892.1	Xenorhabdus bovienii SS-2004	Xenbov
NC_014228.1	Xenorhabdus nematophila ATCC 19061	Xennem
NC_003143.1	Yersinia pestis CO92	Yerpes
SAMN26506853	Lightella neohaematopini L207	L207
SAMN26506860	Lightella neohaematopini L221	L221
*This genome is provided as fasta files with all scaffolds/contigs in the link.

## Sheet: b-Phylogenetic_matrix_genelist
Gene abbreviation	Gene full name
aceE	Pyruvate dehydrogenase E1 component
pnp	Polyribonucleotide nucleotidyltransferase
rh	Transcription termination factor Rho
glyS	Glycine--tRNA ligase beta subunit
rpsA	30S ribosomal protein S1
infB	Translation initiation factor IF-2
trmE	tRNA modification GTPase MnmE
mnmA	tRNA-specific 2-thiouridylase MnmA
ftsH	ATP-dependent zinc metalloprotease FtsH
mraW	Ribosomal RNA small subunit methyltransferase H
prfA	Peptide chain release factor RF1
rpoA	DNA-directed RNA polymerase subunit alpha
aspS	Aspartate--tRNA ligase
pheT	Phenylalanine--tRNA ligase beta subunit

## Sheet: c-Coevolution_matrix_genomes
Accesion number	Taxon (NCBI)	Taxon abbreviation (used in alignment)		Grey background = taxon omitted in the 50-protein "coevolutionary matrix".
SAMN26506851	Lightella neohaematopini (L201)	L201
SAMN26506852	Lightella neohaematopini (L204)	L204
SAMN26506853	Lightella neohaematopini (L207)	L207
SAMN26506854	Lightella neohaematopini (L208)	L208
SAMN26506855	Lightella neohaematopini (L209)	L209
SAMN26506856	Lightella neohaematopini (L214)	L214
SAMN26506857	Lightella neohaematopini (L217)	L217
SAMN26506858	Lightella neohaematopini (L218)	L218
SAMN26506859	Lightella neohaematopini (L220)	L220
SAMN26506860	Lightella neohaematopini (L221)	L221
SAMN26506861	Lightella neohaematopini (L222)	L222
SAMN26506862	Lightella neohaematopini (L469)	L469
	Numbers in this column stand for the number of orthologs shared by all samples from the particular row to the top (e.g., . 409 orthologs are shared by L207, L220, L469 and L222)
L. neohaematopini samples	Number of shared single-gene orthologs
L222	415
L469
L220	411
L207	409
L201	407
L221	407
L218	401
L208	400
L217	357
L209	318
L214	228
L204	5
L215	1
L211	0
L203	0
L219	0
L210	0
L213	0
L206	0
L212	0

## Sheet: d-Coevolution_matrix_genelist
5-protein "coevolutionary matrix"
Gene abbreviation	Gene full name
murB	UDP-N-acetylenolpyruvoylglucosamine reductase
asd	Aspartate-semialdehyde dehydrogenase
panK	Pantothenate kinase
corA	Magnesium transport protein CorA
resA	Thiol-disulfide oxidoreductase ResA
50-protein "coevolutionary matrix"
Gene abbreviation	Gene full name
bamD	Outer membrane protein assembly factor BamD
rplS	50S ribosomal protein L19
trmD	tRNA (guanine-N(1)-)-methyltransferase
rimM	Ribosome maturation factor RimM
rpsP	30S ribosomal protein S16
truA	tRNA pseudouridine synthase A
accD	Acetyl-coenzyme A carboxylase carboxyl transferase subunit beta
ndhH	NAD(P)H-quinone oxidoreductase subunit 3
nuoI	NADH-quinone oxidoreductase subunit I
nuoN	NADH-quinone oxidoreductase subunit N
mreB	Cell shape-determining protein MreB
aroD	3-dehydroquinate dehydratase
accB	Biotin carboxyl carrier protein of acetyl-CoA carboxylase
accC	Biotin carboxylase
urk1	Uridine kinase
pabB	Aminodeoxychorismate synthase component 1
pmbA	Metalloprotease PmbA
dapE	Succinyl-diaminopimelate desuccinylase
tkt1	Transketolase 1
talB	Transaldolase
lig3	DNA ligase
nfo	Endonuclease 4
ycfH	putative metal-dependent hydrolase YcfH
holA	DNA polymerase III subunit delta'
tmpK	Thymidylate kinase
pabC	Aminodeoxychorismate lyase
hsr	Acyl carrier protein
acp	3-oxoacyl-[acyl-carrier-protein] synthase 3
rne	Ribonuclease E
lgt	Phosphatidylglycerol--prolipoprotein diacylglyceryl transferase
lipA	Lipoyl synthase
cot	Octanoyltransferase
murC	UDP-N-acetylmuramate--L-alanine ligase
murF	UDP-N-acetylmuramoyl-tripeptide--D-alanyl-D-alanine ligase
leuRS	Leucine--tRNA ligase
-	GTP cyclohydrolase 1 type 2
ogdC	Dihydrolipoyllysine-residue succinyltransferase component of 2-oxoglutarate dehydrogenase complex
ddl	D-alanine--D-alanine ligase A
bioA	Adenosylmethionine-8-amino-7-oxononanoate aminotransferase
bioB	Biotin synthase
bioF	8-amino-7-oxononanoate synthase
bioC	Malonyl-[acyl-carrier protein] O-methyltransferase
bioD	ATP-dependent dethiobiotin synthetase BioD 1
ispF	2-C-methyl-D-erythritol 2,4-cyclodiphosphate synthase
erpA	Iron-sulfur cluster insertion protein ErpA
pbp1B	Penicillin-binding protein 1B
dksA	RNA polymerase-binding transcription factor DksA
hppK	2-amino-4-hydroxy-6-hydroxymethyldihydropteridine pyrophosphokinase
dld	Dihydrolipoyl dehydrogenase
dlaT	Dihydrolipoyllysine-residue acetyltransferase component of pyruvate dehydrogenase complex

## Sheet: e-Neisseriales__matrix_genomes
Accesion number	Taxon (NCBI)	Taxon abbreviation (used in alignment)
NC_018708.1	Acidovorax sp. KKS102	Acido
NZ_JQKH00000000.1	Alysiella crassa DSM 2578	Alycras
NZ_OCNF00000000.1	Alysiella filiformis DSM 16848	Alyfil
NZ_LNQV00000000.1	Aquitalea pelogenes CCM 7557	Aquipelo
NZ_BCWL00000000.1	Bergeriella denitrificans NBRC 102155	Bergerden
NZ_CP012981.1	Burkholderia cepacia ATCC 25416	Burkcep
NZ_AUMS00000000.1	Chitinilyticum aquatile DSM 21506	Chitinaq
NZ_ARGN00000000.1	Chitiniphilus shinanonensis DSM 23277	Chitinsh
NZ_MKCR00000000.1	Chromobacterium amazonense ASM185556v1	Chromamaz
NC_005085.1	Chromobacterium violaceum ATCC 12472	Chromviol
NZ_JHZP00000000.1	Conchiformibius steedae DSM 2580	Concifst
NZ_ACEA00000000.1	Eikenella corrodens ATCC 23834	Eikcorr
NZ_SMBT00000000.1	Iodobacter fluviatilis DSM 3764	Iodobflu
NZ_CP017668.1	Jeongeupia sp. USM3	Jeong
NZ_AEWV00000000.1	Kingella denitrificans ATCC 33394	Kbacil
NZ_CBSQ000000000.1	Kingella kingae Vir5453	Kden
NZ_ACJW00000000.2	Kingella oralis ATCC 51147	Kking
NC_012559.1	Laribacter hongkongensis HLHK9	Koral
NC_002942.5	Legionella pneumophila subsp. pneumophila str. Philadelphia 1	Larihon
NZ_JUFZ00000000.1	Morococcus cerebrosus CIP 81.93	Legiopneu
NZ_AFAY00000000.1	Neisseria bacilliformis ATCC BAA-1200	Morocere
NZ_MTBL00000000.1	Neisseria canis ASM210849v1	Ncanis
NC_002946.2	Neisseria gonorrhoeae FA 1090	Ngonor
NC_003112.2	Neisseria meningitidis MC58	Nmenin
CP046107.1	Neisseriaceae bacterium str. HaMa	NsymbHacan
GCA_017114885.1	Neisseriaceae bacterium PsAf	NsymbPser
NZ_AGAZ00000000.1	Neisseria wadsworthii 9715	Nwads
NZ_LT571436.1	Neisseria weaveri 34903_D01	Nwaev
NZ_ACIS00000000.1	Pseudogulbenkiania ferrooxidans 2002	Pseudofer
NC_011369.1	Rhizobium leguminosarum bv. trifolii WSM2304	Rhizolegu
NZ_ADCY00000000.2	Simonsiella muelleri ATCC 29453	Simonmue
NZ_CP007446.1	Snodgrassella alvi wkB2	Snodalvi
NZ_JQKE00000000.1	Stenoxybacter acetivorans DSM 19021	Stenoacet
NZ_ARNN00000000.1	Vitreoscilla stercoraria DSM 513	Vitster
NZ_RBID00000000.1	Vogesella indigofera DSM 3303	Vogindi
SAMN26583028	Neisseriaceae-related bacterium (N204)	N204
SAMN26583029	Neisseriaceae-related bacterium (N206)	N206

## Sheet: f-Neisseriales_matrix_genelist
Gene abbreviation	Gene full name
rpsO	30S ribosomal protein S15
rpsR	30S ribosomal protein S18
rpsG	30S ribosomal protein S7
rplW	50S ribosomal protein L23
rplQ	50S ribosomal protein L17
minC	septum site-determining protein MinC
lipB	lipoyl(octanoyl) transferase LipB
atpA	F0F1 ATP synthase subunit alpha
glyQ	glycine--tRNA ligase subunit alpha
lpxC	UDP-3-O-acyl-N-acetylglucosamine deacetylase
grcC	polyprenyl synthetase family protein
purN	phosphoribosylglycinamide formyltransferase
RNase III	ribonuclease III
pdxJ	pyridoxine 5'-phosphate synthase
KARS1	lysine--tRNA ligase
DHFR	dihydrofolate reductase
Ts	elongation factor Ts
rlmE	RlmE family RNA methyltransferase
YbaB/EbfC	YbaB/EbfC family nucleoid-associated protein
purD	phosphoribosylamine--glycine ligase
rpsB	30S ribosomal protein S2
ihfA	integration host factor subunit alpha
pheS	phenylalanine--tRNA ligase subunit alpha
-	trigger factor
rpsU	30S ribosomal protein S21
YqgE/AlgH	YqgE/AlgH family protein
rpsE	30S ribosomal protein S5
TsaB	tRNA (adenosine(37)-N6)-threonylcarbamoyltransferase complex dimerization subunit type 1 TsaB
YajC	preprotein translocase subunit YajC
IF-4	translation initiation factor IF-4

## Sheet: g-Accessionnumbers_genomedrafts
Accesion number (BioSample NCBI)*	Taxon (NCBI)	Taxon abbreviation
SAMN26506851	Lightella neohaematopini (L201)	L201
SAMN26506852	Lightella neohaematopini (L204)	L204
SAMN26506853	Lightella neohaematopini (L207)	L207
SAMN26506854	Lightella neohaematopini (L208)	L208
SAMN26506855	Lightella neohaematopini (L209)	L209
SAMN26506856	Lightella neohaematopini (L214)	L214
SAMN26506857	Lightella neohaematopini (L217)	L217
SAMN26506858	Lightella neohaematopini (L218)	L218
SAMN26506859	Lightella neohaematopini (L220)	L220
SAMN26506860	Lightella neohaematopini (L221)	L221
SAMN26506861	Lightella neohaematopini (L222)	L222
SAMN26506862	Lightella neohaematopini (L469)	L469
SAMN26583028	Neisseriaceae-related bacterium (N204)	N204
SAMN26583029	Neisseriaceae-related bacterium (N206)	N206
* all genome drafts are deposited in NCBI under the same BioProject number (PRJNA813538)
